# Supplementary material for: The Evolution of Effort-Reward Imbalance in Workers during the COVID-19 Pandemic in France—An Observational Study in More than 8000 Workers
Source: MDPI journal article supplement (doi:10.3390/ijerph19159113), 2022-07-26
Supplement: s1 [file s1]

**Supplementary Material:**

**Supplementary Table S1:** Summary of the second-order interactions between variables in the final GEE model on the full population.

**Supplementary Table S2:** Summary of the second-order interactions between variables in the sensitivity analysis of the GEE model performed on the subgroup in whom the Effort Reward Imbalance score was collected for the pre-pandemic, lockdown 1 and lockdown 2 periods.

**Supplementary Table S3:** Exploratory analysis of factors associated with ERI score as a quantitative variable for each period of interest, using linear bivariate and multivariate analysis.

**Supplementary Figure S1:** Sensitivity analysis of the GEE models, using the subgroup of respondents in whom the ERI was collected for the pre-pandemic, lockdown 1 and lockdown 2 periods.

**Supplementary Table S1.** Summary of the second-order interactions between variables in the final GEE model on the full population.

| <b>Variable Interaction Term</b>                | <b>Coefficient</b> | <b>95% CI</b>   | <b><i>p</i>-Value</b> |
|-------------------------------------------------|--------------------|-----------------|-----------------------|
| occupation [medical] * Nb Hours per Week [>50]  | -1.42              | -2.66 to -0.18  | 0.025                 |
| sex [Female] * number of children [4 or more]   | -10.36             | -17.92 to -2.80 | 0.007                 |
| sex [Female] * Nb Hours per Week [30–40]        | 1.12               | 0.06 to 2.18    | 0.038                 |
| age [35–45] * number of children [1]            | -7.42              | -12.59 to -2.25 | 0.005                 |
| age [above 65] * Nb Hours per Week [30–40]      | -4.39              | -7.68 to -1.09  | 0.009                 |
| age [above 65] * Nb Hours per Week [40–50]      | -2.88              | -5.60 to -0.17  | 0.037                 |
| marital status [other] * number of children [3] | -14.92             | -28.95 to -0.88 | 0.037                 |
| Nb Hours per Week [>50] * period                | -0.34              | -0.57 to -0.11  | 0.004                 |
| Nb Hours per Week [40–50] * period              | -0.28              | -0.49 to -0.06  | 0.011                 |

**Supplementary Table S2.** Summary of the second-order interactions between variables in the sensitivity analysis of the GEE model performed on the subgroup in whom the Effort Reward Imbalance score was collected for the pre-pandemic, lockdown 1 and lockdown 2 periods.

| Variable Interaction Term                       | Coefficient | 95% CI           | <i>p</i> -Value |
|-------------------------------------------------|-------------|------------------|-----------------|
| occupation2 [paramedical] * age [above 65]      | 22.17       | 3.00 to 41.34    | 0.023           |
| sex [Female] * age [35–45]                      | –8.59       | –16.87 to –0.31  | 0.042           |
| age [above 65] * marital status [as couple]     | –29.75      | –52.05 to –7.46  | 0.009           |
| age [above 65] * Nb hours per week [30–40]      | –22.86      | –45.41 to –0.31  | 0.047           |
| age [above 65] * Nb hours per week [40–50]      | –18.11      | –36.16 to –0.06  | 0.049           |
| marital status [other] * number of children [1] | –29.81      | –47.95 to –11.66 | 0.001           |

**Supplementary Table S3.** Exploratory analysis of factors associated with ERI score as a quantitative variable for each period of interest, using bivariate and multivariate analysis.

| Variables                                  | Pre-pandemic Period |              |               |                 | Lockdown 1      |              |               |                 | Lockdown 2      |              |              |                 |
|--------------------------------------------|---------------------|--------------|---------------|-----------------|-----------------|--------------|---------------|-----------------|-----------------|--------------|--------------|-----------------|
|                                            | Bivariate           | Multivariate |               |                 | Bivariate       | Multivariate |               |                 | Bivariate       | Multivariate |              |                 |
|                                            | <i>p</i> -Value     | Estimate     | 95% CI        | <i>p</i> -Value | <i>p</i> -Value | Estimate     | 95% CI        | <i>p</i> -Value | <i>p</i> -Value | Estimate     | 95% CI       | <i>p</i> -Value |
| Age (reference [35–45])                    | < 0.001             |              |               |                 | 0.08            |              |               |                 | 0.48            |              |              |                 |
| Age [45–55]                                |                     | −0.86        | [−3.3 : 1.6]  | 0.49            |                 | 0.6          | [−1.3 : 2.5]  | 0.5             |                 | –            | –            | –               |
| Age [55–65]                                |                     | 4.9          | [2.2 : 7.6]   | < 0.001         |                 | 2.2          | [−0.05 : 4.5] | 0.05            |                 | –            | –            | –               |
| Age > 65]                                  |                     | 11.1         | [5.1 : 17]    | < 0.001         |                 | −3.4         | [−8.6 : 1.8]  | 0.2             |                 | –            | –            | –               |
| Age [< 35]                                 |                     | 0.9          | [−1.9 : 3.8]  | 0.52            |                 | 2.2          | [0.1 : 4.3]   | 0.04            |                 | –            | –            | –               |
| Marital Status (Reference : Single)        | 0.9                 |              |               |                 | 0.9             |              |               |                 | 0.6             |              |              |                 |
| Marital Status : Couple                    |                     | –            | –             | –               |                 | –            | –             | –               |                 | –            | –            | –               |
| Marital Status : Other                     |                     | –            | –             | –               |                 | –            | –             | –               |                 | –            | –            | –               |
| Number of children (reference : 0)         | 0.03                |              |               |                 | 0.049           |              |               |                 | 0.75            |              |              |                 |
| Number of children : 1                     |                     | 1.14         | [−1.8 : 4.1]  | 0.45            |                 | −0.9         | [−3.1 : 1.3]  | 0.4             |                 | –            | –            | –               |
| Number of children : 2                     |                     | −0.02        | [−2.6 : 2.6]  | 0.99            |                 | −0.1         | [−2.1 : 1.8]  | 0.9             |                 | –            | –            | –               |
| Number of children : 3                     |                     | 0.03         | [−3.2 : 3.3]  | 0.98            |                 | 0.6          | [−1.9 : 3.2]  | 0.6             |                 | –            | –            | –               |
| Number of children : ≥ 4                   |                     | 2.71         | [−1.9 : 7.4]  | 0.25            |                 | 3.3          | [−0.6 : 7.3]  | 0.1             |                 | –            | –            | –               |
| Sex (reference : Male)                     | 0.02                |              |               |                 | 0.16            |              |               |                 | 0.17            |              |              |                 |
| Sex : Female                               |                     | 1.06         | [−1.1 : 3.3]  | 0.34            |                 | –            | –             | –               |                 | –            | –            | –               |
| Occupation (reference : Non-Healthcare)    | < 0.001             |              |               |                 | < 0.001         |              |               |                 | 0.02            |              |              |                 |
| Occupation : Medical                       |                     | 0.73         | [−1.6 : 3.1]  | 0.54            |                 | 4.1          | [2 : 6.3]     | < 0.001         |                 | 4.9          | [0.6 : 9.2]  | 0.03            |
| Occupation : Paramedical                   |                     | −2.86        | [−5.5 : −0.2] | 0.03            |                 | 0.8          | [−1.1 : 2.7]  | 0.4             |                 | −2.2         | [−5.7 : 1.3] | 0.22            |
| Weekly working hours (reference : [30–40]) | < 0.001             |              |               |                 | < 0.001         |              |               |                 | 0.67            |              |              |                 |
| Weekly working hours : < 30                |                     | 2.24         | [−0.8 : 5.3]  | 0.14            |                 | −1.5         | [−3.6 : 0.5]  | 0.1             |                 | –            | –            | –               |
| Weekly working hours : > 50                |                     | 4.36         | [1.5 : 7.2]   | < 0.01          |                 | 4.4          | [2 : 6.9]     | < 0.001         |                 | –            | –            | –               |
| Weekly working hours : 40–50               |                     | 2.89         | [0.4 : 5.4]   | 0.02            |                 | 1.9          | [−1 : 3.8]    | 0.07            |                 | –            | –            | –               |
| <b>Performance metrics</b>                 |                     |              |               |                 |                 |              |               |                 |                 |              |              |                 |
| RSE (Residual Standard Error)              | –                   | 0.42         |               |                 | –               | 0.55         |               |                 | –               | 0.51         |              |                 |
| Adjusted R <sup>2</sup>                    | –                   | 0.02         |               |                 | –               | 0.01         |               |                 | –               | 0.003        |              |                 |

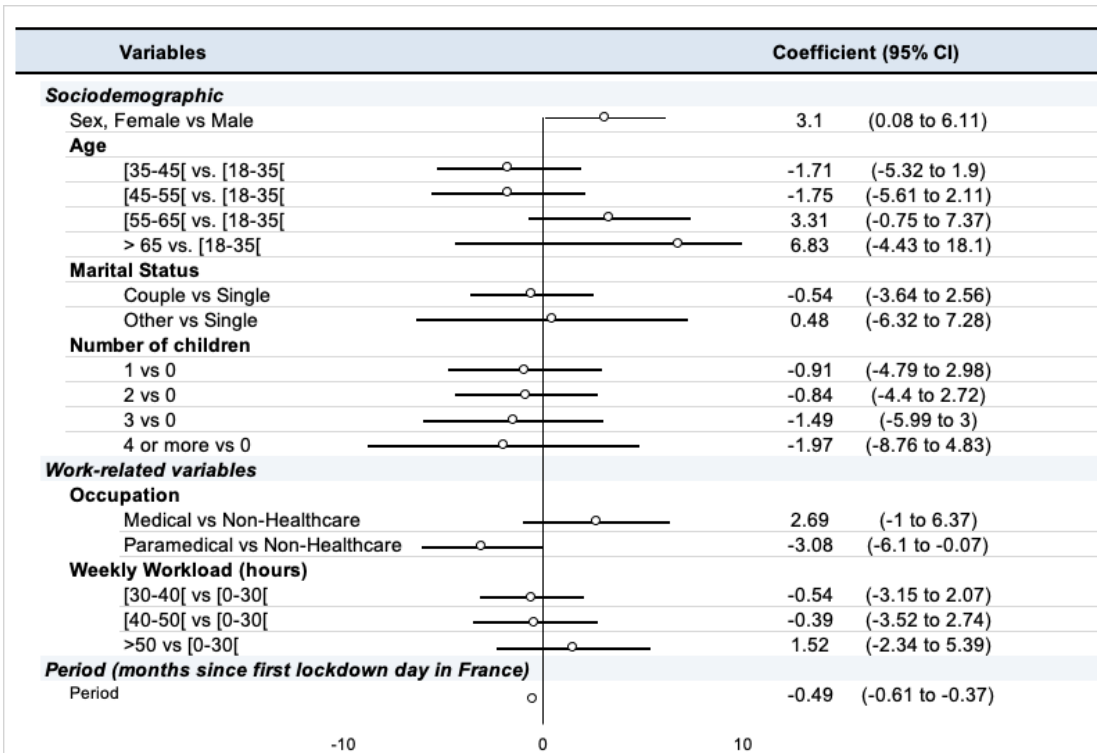

**Supplementary Figure S1.** Summary of sensitivity analysis for the GEE model with exchangeable covariance structure (GEE-ex), performed on the subgroup in whom the Effort Reward Imbalance score was collected for the pre-pandemic, lockdown 1 and lockdown 2 periods.
